# Supplementary material
Source: Springer Nature journal article supplement (https://www.springermedizin.de/resource/supplementary/12990_2014_638_MOESM6_ESM.pdf/9612274)

# CeA neuronal activity

## A Normal

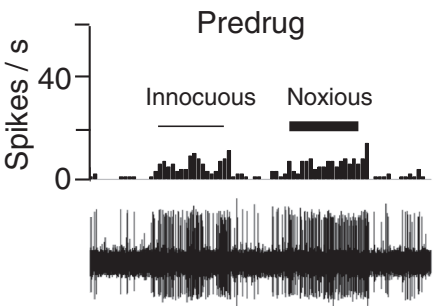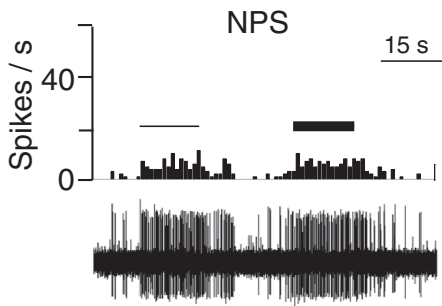

## B Arthritis

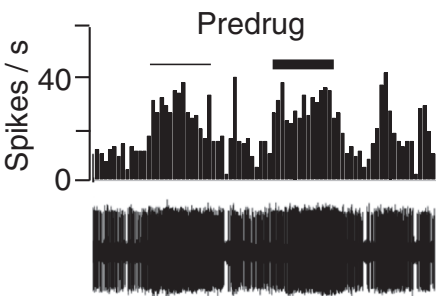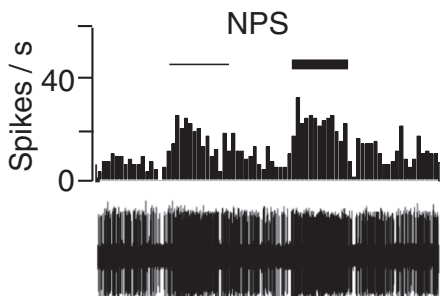

## C Arthritis

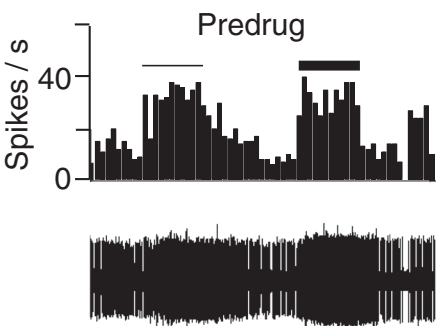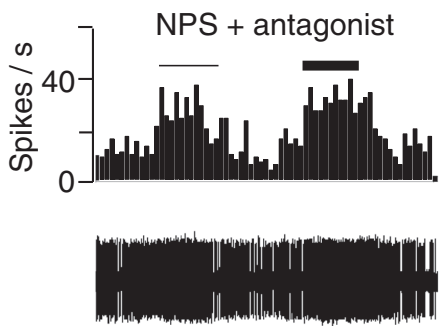

Supplement: MOESM6 [file 9612274]
